# Supplementary material for: Cdk1-mediated DIAPH1 phosphorylation maintains metaphase cortical tension and inactivates the spindle assembly checkpoint at anaphase
Source: PubMed Central journal article supplement (PMC6395754; doi:10.1038/s41467-019-08957-w), 2019-02-28
Supplement: 41467_2019_8957_MOESM1_ESM.pdf [file 41467_2019_8957_MOESM1_ESM.pdf]

## SUPPLEMENTARY INFORMATION

Cdk1-mediated DIAPH1 phosphorylation maintains cortical tension during metaphase, which regulates inactivation of the spindle assembly checkpoint at anaphase onset

Nishimura et al.

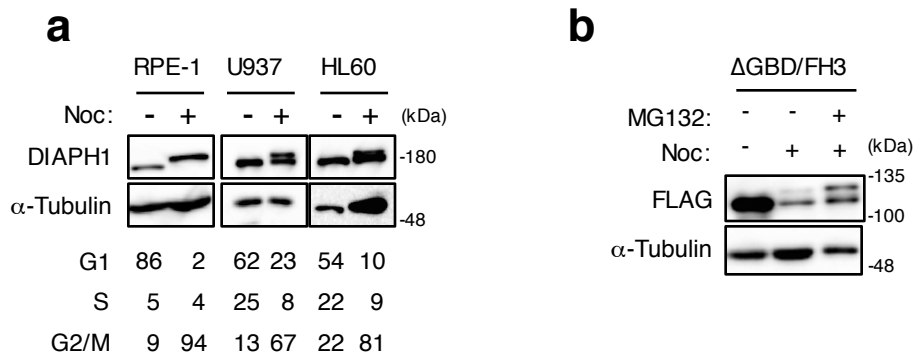

**Supplementary Figure 1. Endogenous DIAPH1 is phosphorylated in multiple cell lines**

**(a)** RPE-1, U937 and HL60 cells were collected in the presence (+) or absence (-) of 100 ng/ml nocodazole for 18 hrs, followed by mitotic shake-off (RPE-1). Cell lysates were subjected to immunoblotting. Cell cycle synchronization was monitored by FACS analysis. **(b)** HeLa cells transduced with 3xFLAG-DIAPH1- $\Delta$ GBD/FH3 mutant were synchronized by nocodazole and mitotic shake-off as described in a, in the presence (+) or absence (-) of 20 mM MG-132 treatment for 8 hrs. Cell lysates were subjected to immunoblotting.

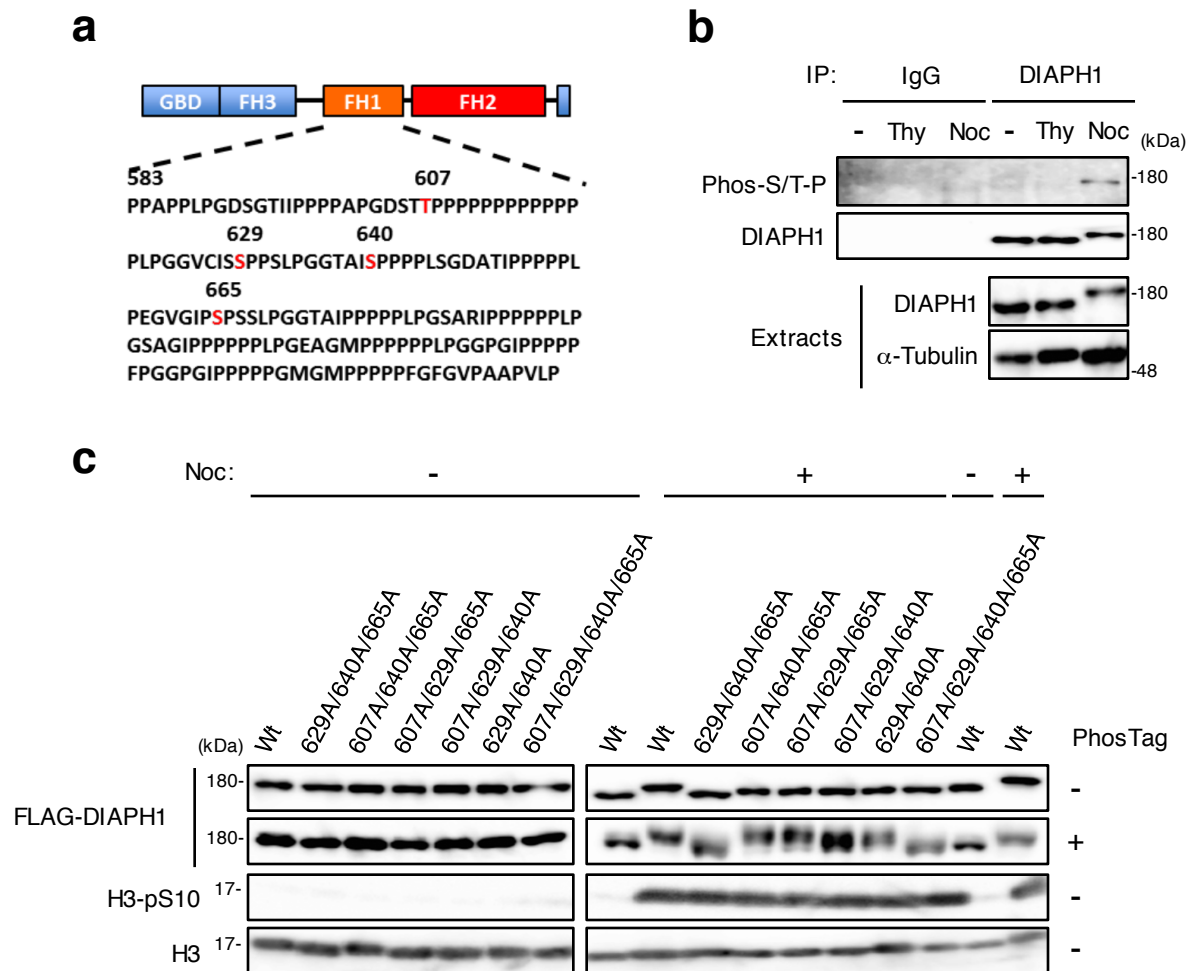

**Supplementary Figure 2. S/T-P sites within the FH1 domain are phosphorylated during mitosis**

**(a)** Amino acid sequence of the FH1 domain. S/T-P sites are shown in red. **(b)** HeLa cells were synchronized by double thymidine treatment (2.5 mM) for 16 hrs plus 8 hrs (Thy) or nocodazole treatment (100 ng/ml) for 18 hrs, followed by mitotic shake-off (Noc). Cell lysates were subjected to immunoprecipitation with mouse IgG or anti-mDia1 and immunoblotting. (-), asynchronous culture. **(c)** HeLa cells expressing 3xFLAG-DIAPH1-Wt or DIAPH1 mutants were synchronized by nocodazole treatment and mitotic shake-off as in **(a)**. Cell lysates were subjected to Phos-tag SDS-PAGE and immunoblotting using the indicated antibodies.

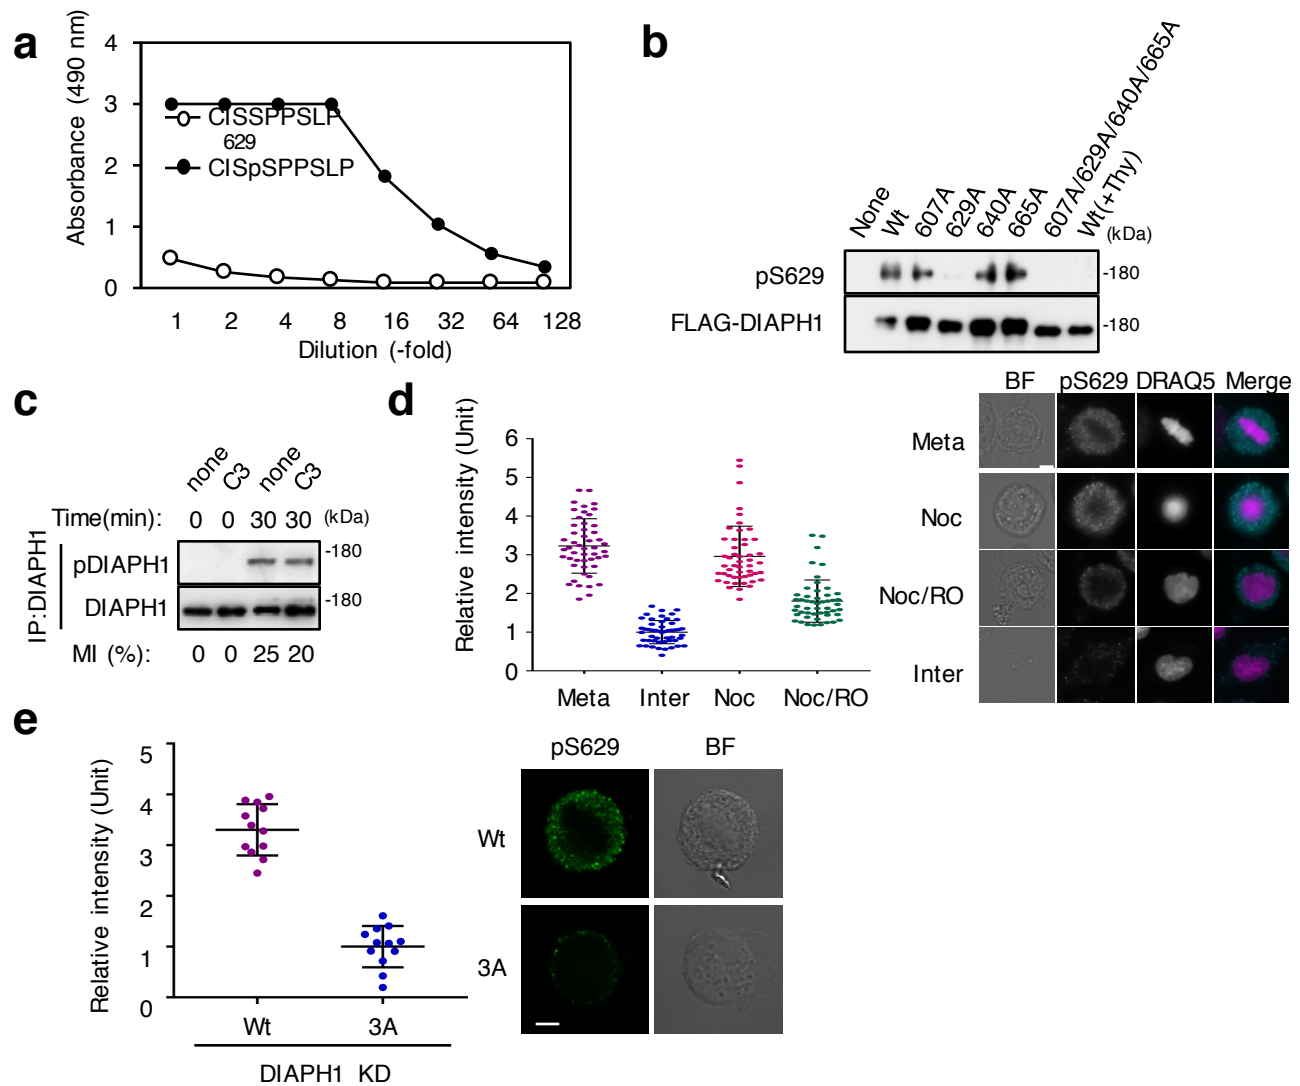

### Supplementary Figure 3. Phospho-specific antibodies recognize p-DIAPH1 at S629

(a) Specificity of antibodies to phosphorylated DIAPH1 at S629 was evaluated by ELISA using phospho- or unphospho-peptides as indicated. (b) HeLa cells expressing 3×FLAG-DIAPH1-Wt or its mutants were synchronized by nocodazole, followed by mitotic shake-off or with 2.5 mM thymidine (+Thy). Cell lysates were then subjected to immunoprecipitation using anti-FLAG antibody followed by immunoblotting using anti-phospho-Ser629 antibodies. (c) HeLa cells were synchronized at G2 phase and then released into fresh medium with or without 2 μg/ml C3 transferase. Samples were collected at the indicated times, and subjected to immunoprecipitation with anti-DIAPH1 followed by immunoblotting with the indicated antibodies. Mitotic cells were monitored by DAPI staining and mitotic index (MI%) was determined as percentages of total cell (n=100). (d) Asynchronous HeLa cells (Meta, Inter) or HeLa cells treated with nocodazole (Noc) or nocodazole followed by RO-3306 treatment (Noc/RO) were fixed with formaldehyde and immunostained using anti-pS629 antibodies. Chromosomes were visualized by DRAQ5 staining. Left: relative signal intensity (mean) of the cytosolic signal was quantified. Black bars indicate means ±SD. Right: representative images are shown. Scale bar, 5 μm. n=50 for each phase. (e) Asynchronous DIAPH1-knockdown HeLa cells (DIAPH1-KD) expressing DIAPH1-Wt or -3A were fixed with formaldehyde and then subjected to immunostaining using anti-pS629 antibodies. Chromosomes were visualized by DAPI staining. The cells undergoing mitotic cell rounding were analyzed. Left: relative signal intensity (mean) of the cytosolic signal was quantified. Black bars indicate means ±SD. Right: representative images are shown. Scale bar, 5 μm. Wt: n=12, 3A: n=12.



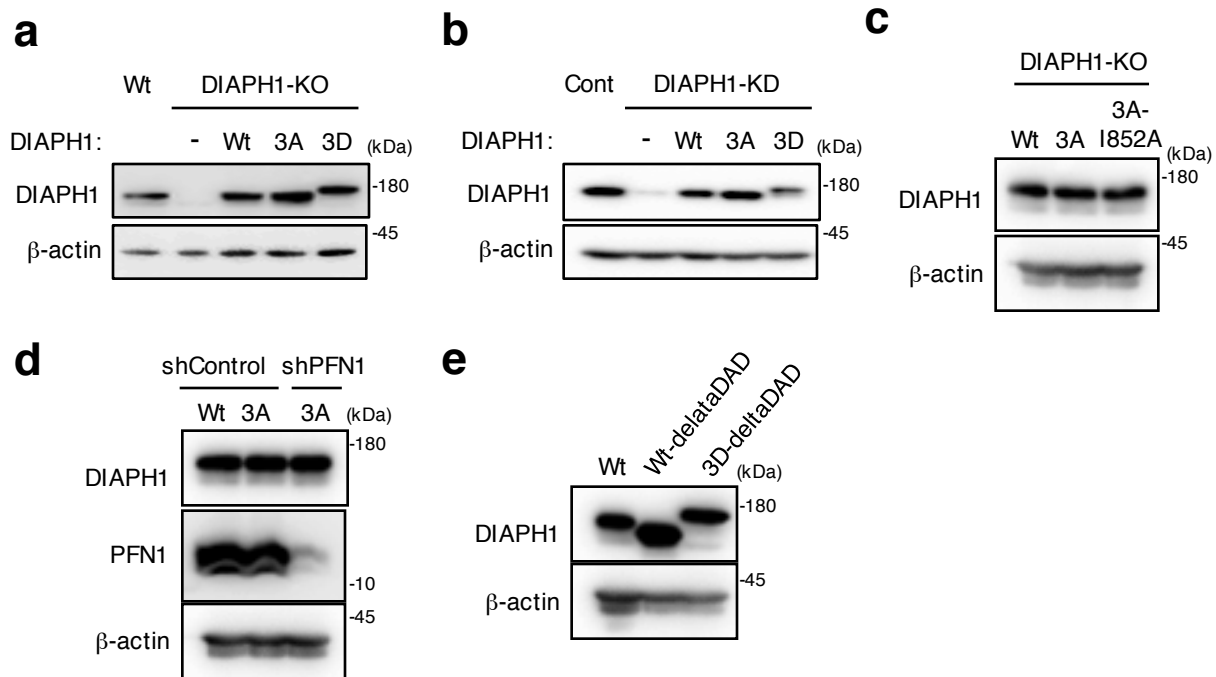

**Supplementary Figure 4. Ectopic expression of wild-type DIAPH1 and its mutants in DIAPH1-KO HeLa cells**

**(a)** Cell lysates were prepared from control (Wt) or H2B-mCherry-KO-Wt, -3A, or -3D cells and were subjected to immunoblotting using the indicated antibodies. **(b)** Inducible H2B-mCherry-KD-Wt, -3A, or -3D were treated with doxycycline (1 μg/ml) for 24 hrs, and the cell lysates were subjected to immunoblotting using the indicated antibodies. **(c)** Whole cell lysates from Life-Act-mCherry-KO-Wt, -3A, or -3A/I852A mutants were subjected to immunoblotting using the indicated antibodies. **(d)** Whole cell lysates from Life-Act-mCherry-KO-Wt expressing tet-on shControl, -3A expressing tet-on shControl, or -3A expressing tet-on shPFN1 in the presence of 1 μg/ml doxycycline were subjected to immunoblotting using the indicated antibodies. **(e)** Whole cell lysates from Life-Act-mCherry-KO-Wt, -Wt/DAD, or -3D/DAD were subjected to immunoblotting using the indicated antibodies.

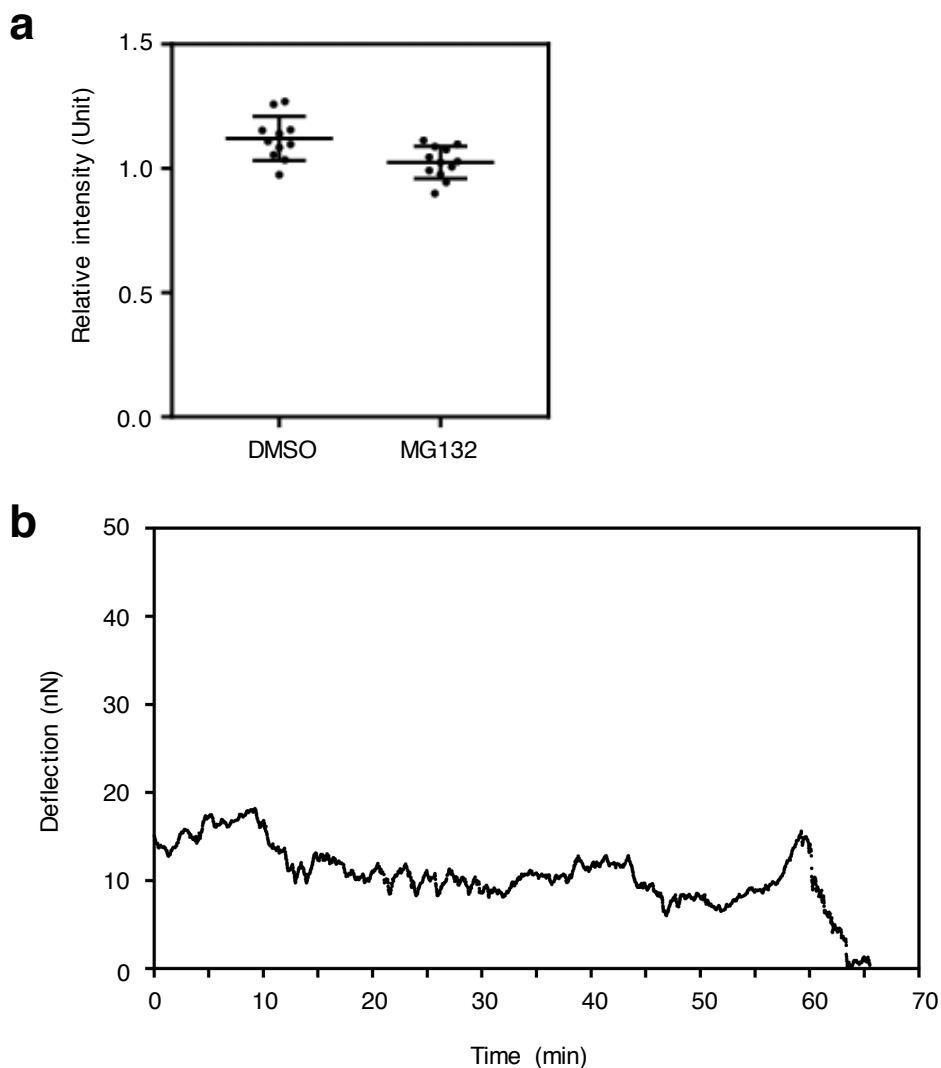

**Supplementary Figure 5. Prolonged mitosis does not affect accumulation of F-actin on the cellular cortex and cortical tension**

**(a)** Control HeLa cells expressing Life-Act-mCherry were stained with Hoechst 33342 for 10 min to monitor mitotic progression. Cells were then treated with either DMSO or MG132 (10  $\mu$ M) and mitotic cells were imaged by microscopy without fixation. Relative signal intensities of mCherry at the cell cortex were quantified by Image J software. Black bars indicate means  $\pm$ SD. DMSO: n=11, MG132: n=12. **(b)** Constant-height assay using AFM. The graph shows the upward deflection of the cantilever in the mitotic progression of control HeLa cells in the presence of MG132 (10  $\mu$ M).

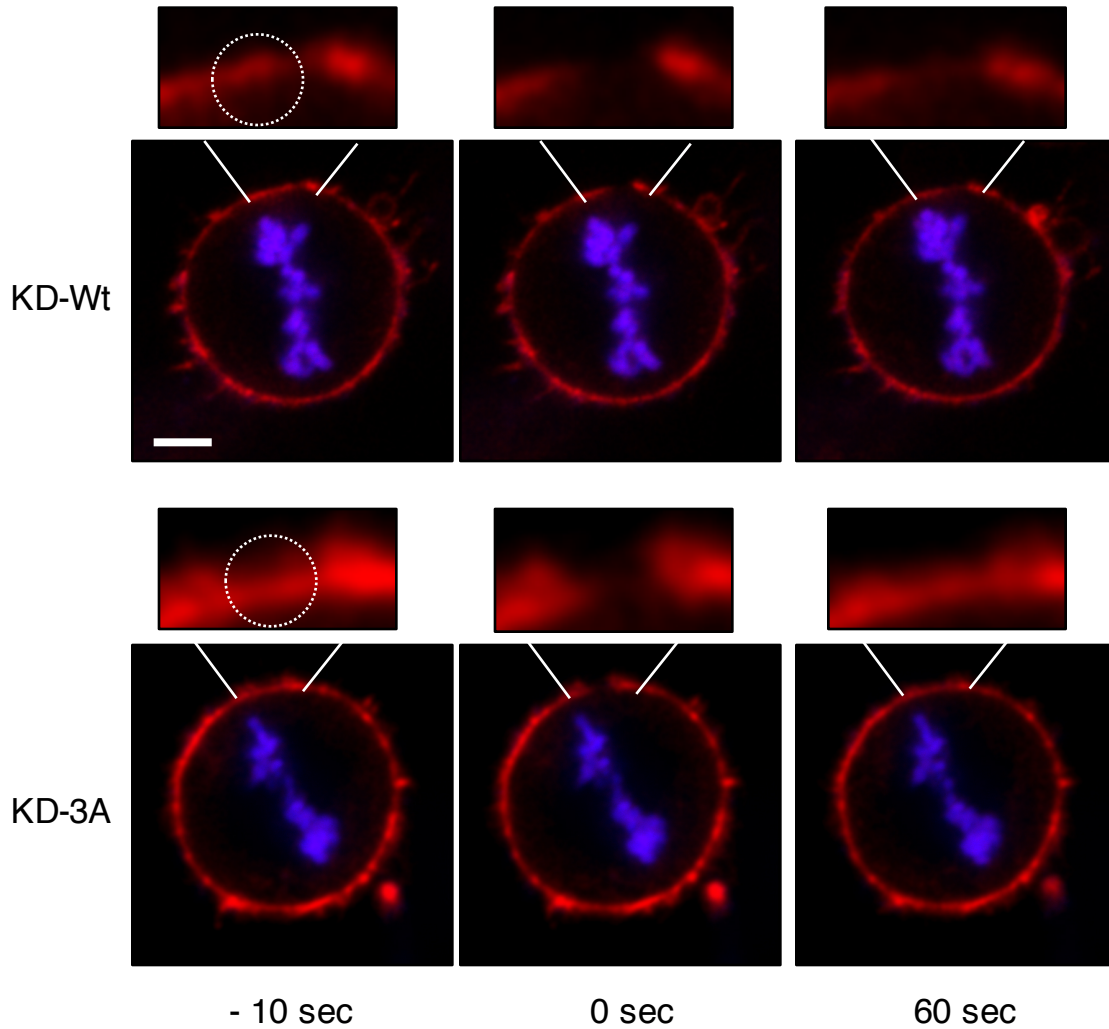

**Supplementary Figure 6. Confocal microscope images of cells treated with SiR-Actin and Hoechst 33342 before and after laser irradiation**

FRAP analysis was performed using LSM-780 inverted confocal microscope (Carl Zeiss) equipped with a GaAsp Detector. Cells were incubated with 100 nM SiR-Actin (Cytoskeleton Inc.) for 1 hr in order to visualize F-actin. Hoechst33342 was added to the medium 5 min before the imaging. A circular area of 1  $\mu$ m diameter at the actin cortex of a metaphase cell was bleached with the 633 nm laser (100% laser power).

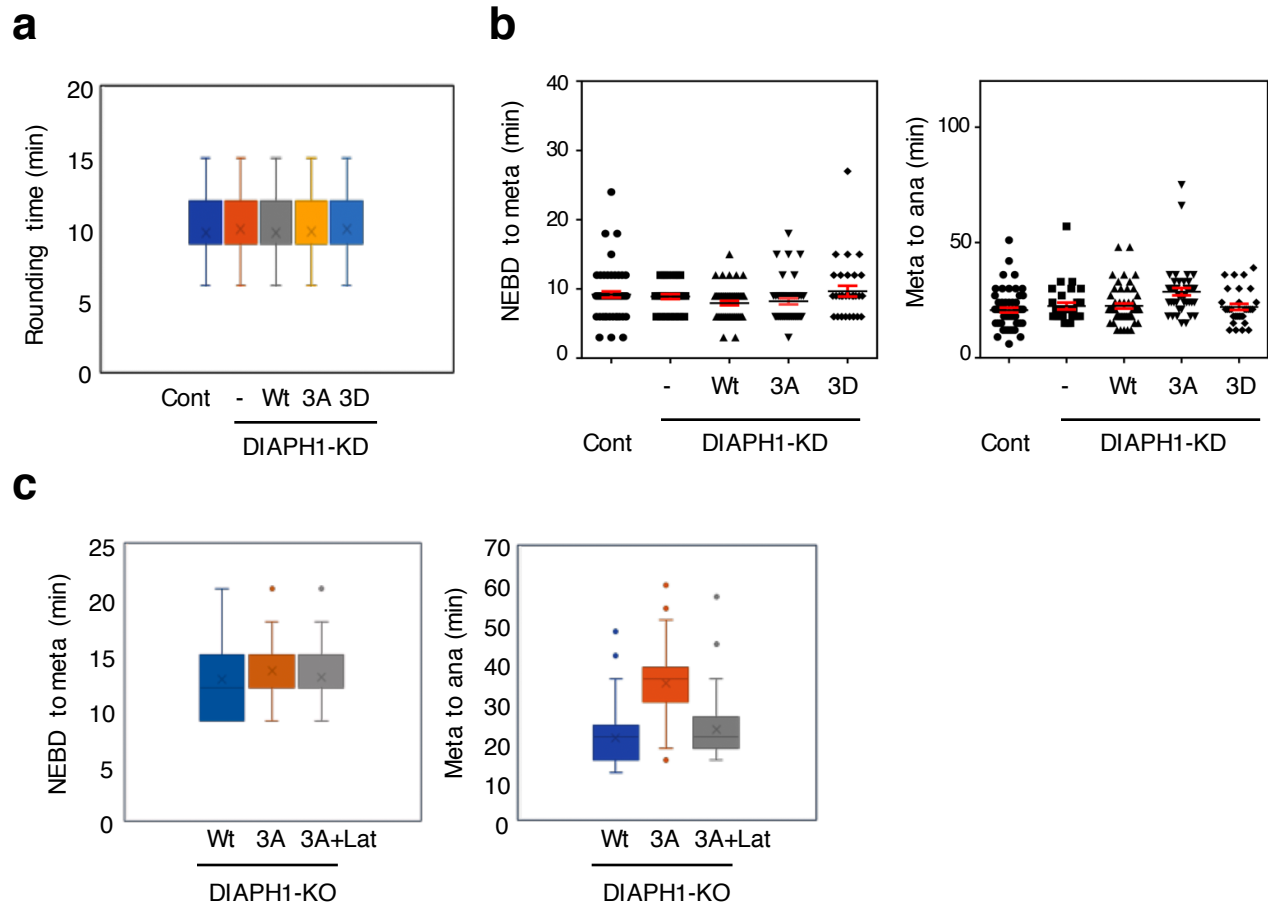

**Supplementary Figure 7. Accumulation of F-actin and delayed onset of anaphase in KO-3A or KD-3A cells**

**(a)** Control (Cont) or DIAPH1-KO HeLa cells expressing DIAPH1-Wt, -3A, or -3D mutants together with histone H2B-mCherry were imaged by time-lapse microscopy every 3 min (images were the same as that used for Figure 5a). The time interval between NEBD and mitotic rounding was determined. Cont: N=33, DIAPH1-KO: N=30, Wt: n=24, 3A: n=34, 3D: n=34. **(b)** Tet-on inducible Luciferase (Cont)- or DIAPH1 shRNA HeLa cells expressing mock (-), DIAPH1-Wt, -3A, or -3D together with Histone-H2B-mCherry were treated with doxycycline (1 $\mu$ g/ml) for 24 hrs, and then imaged by time-lapse microscopy every 3 min. The time duration between NEBD to metaphase or metaphase to anaphase was determined. Red bars with numbers indicate averages of the time length in minutes. Cont: n=59, DIAPH1-KD: n=31, Wt: n=53, 3A: n=45, 3D: n=31. **(c)** DIAPH1-KO cells expressing DIAPH1-Wt or -3A together with histone H2B-mCherry were treated with or without latrunculin A (1  $\mu$ M) 30 min before analysis, and then imaged by time-lapse microscopy every 3 min. Wt: n=50, 3A: n=48, 3A (1  $\mu$ M latrunculin A): n=52. Durations were determined as in **(a)** and colored bars indicate means  $\pm$  SE.

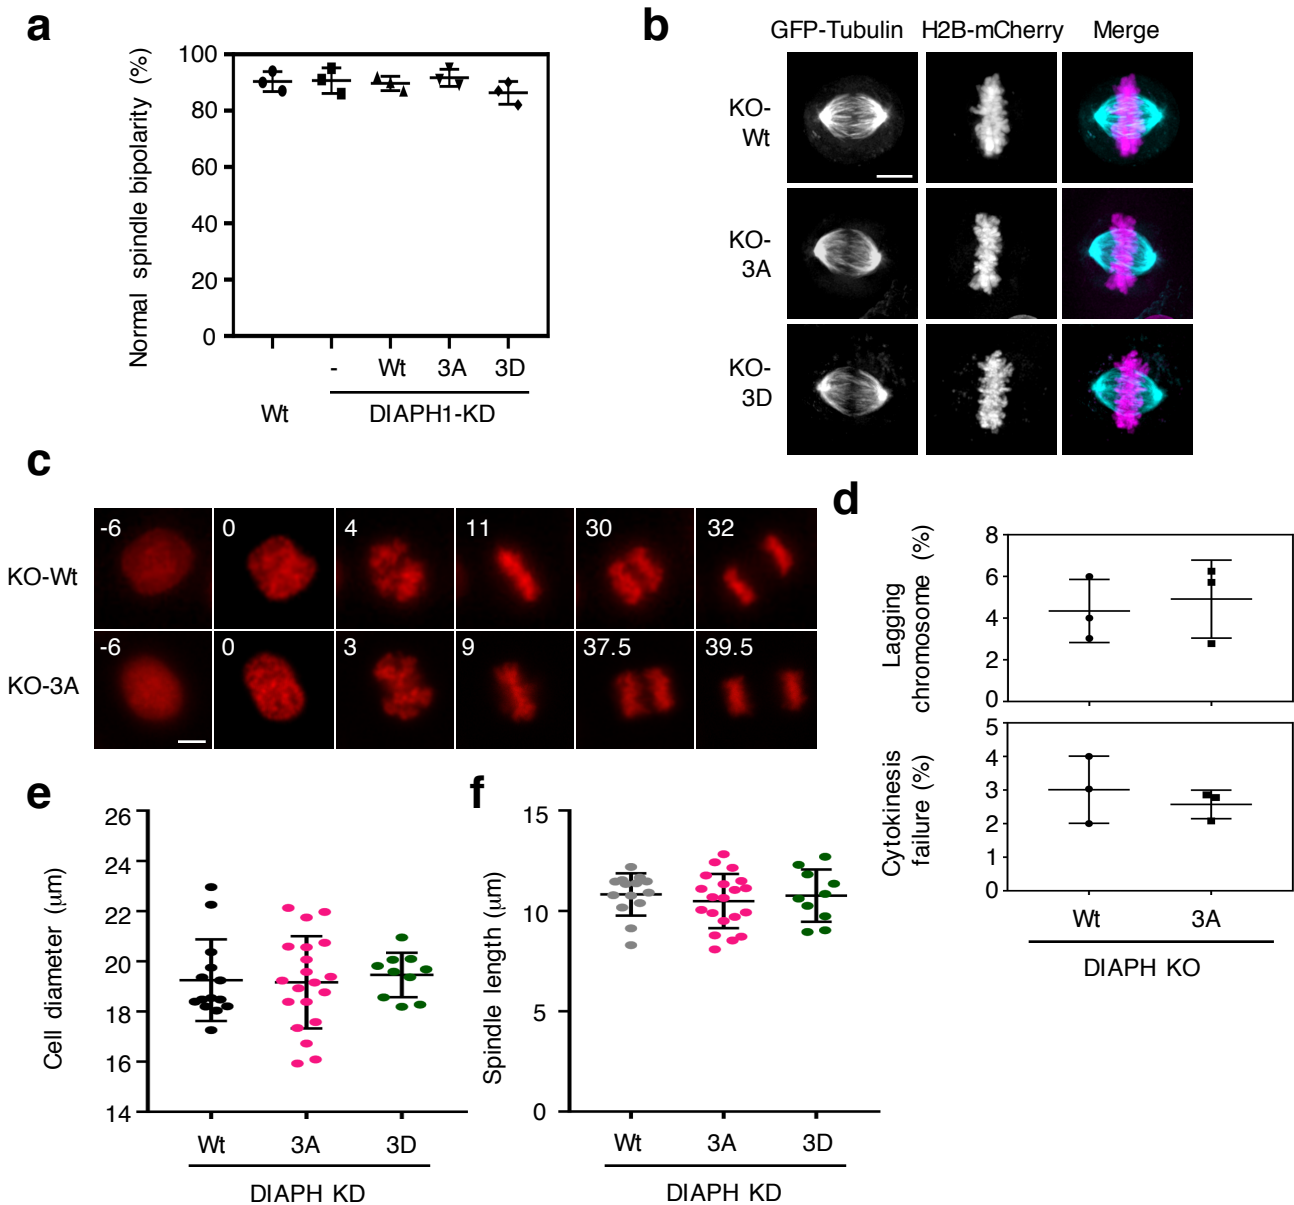

**Supplementary Figure 8. DIAPH1-knockdown HeLa cells expressing DIAPH1-Wt, -3A, or -3D mutants show apparently normal spindle architecture, chromosome alignment, and cytokinesis**

**(a)** Control (Wt) or KD-mock (-), -3A, or -3D expressing tubulin-EGFP were subjected to Hoechst 33342 staining for DNA, and observed by microscopy to quantify the number of cells (n=200) with normal spindle bipolarity in metaphase cells. The results were obtained from three independent experiments. Black bars indicate means  $\pm$ SD. **(b)** Spindle architecture and chromosomes at anaphase of inducible H2B-mCherry-KD-Wt or -3A cells were analyzed. Scale bar, 5  $\mu$ m. **(c)** Inducible H2B-mCherry-KD-Wt or -3A cells were subjected to live-cell imaging. Times after nuclear envelope breakdown are shown. Please see Supplementary Movies 1 and 2. Scale bar, 5  $\mu$ m. **(d)** H2B-mCherry-KO-Wt or -3A cells were imaged by time-lapse microscopy every 3 min. The number of cells (n=200) with lagging chromosomes (upper) or cytokinesis failure (lower) were determined. Black bars indicate means  $\pm$ SD. The results were obtained from three independent experiments. Cell diameter **(e)**, Wt: n=14, 3A: n=20, 3D: n=10, or spindle length **(f)**, Wt: n=24, 3A: n=20, 3D: n=10, of these cells were determined.

Figure 1a

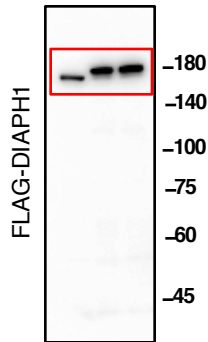

Figure 1b

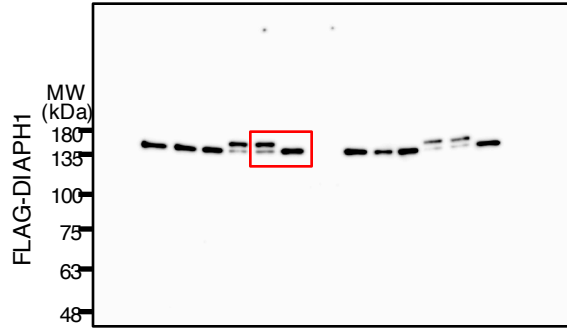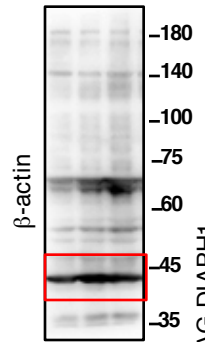

Figure 1c

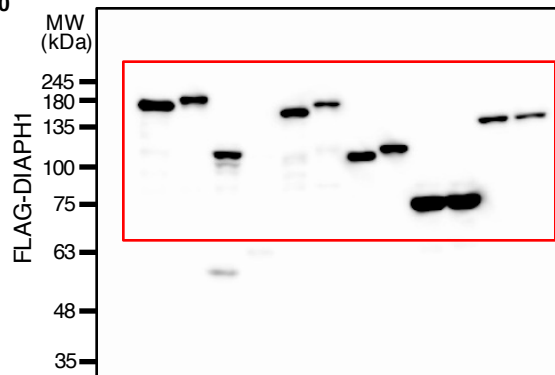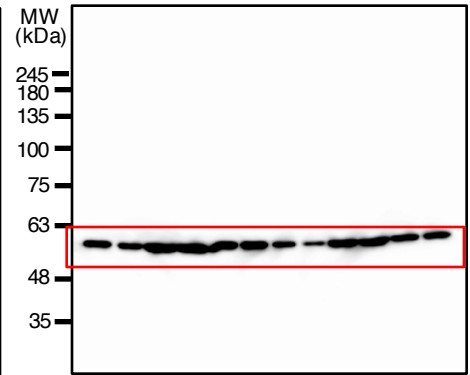

Figure 1d

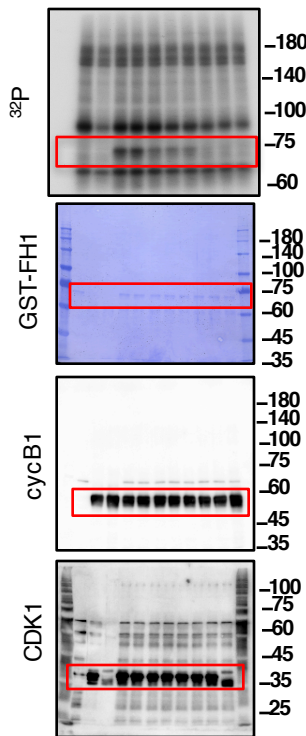

Figure 1e

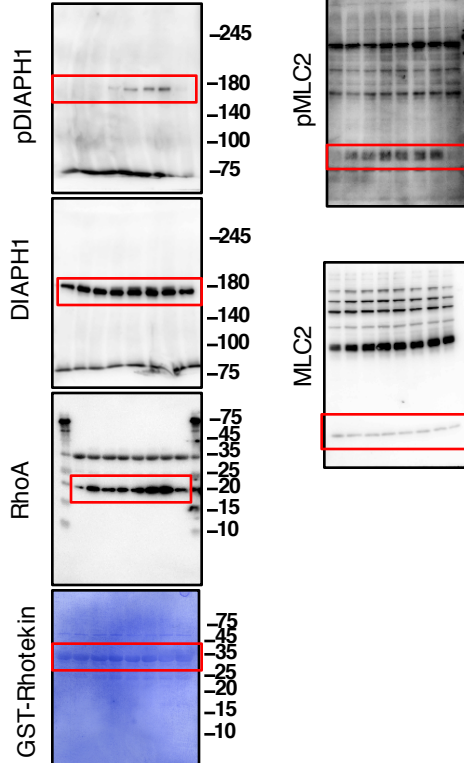

Figure 1f

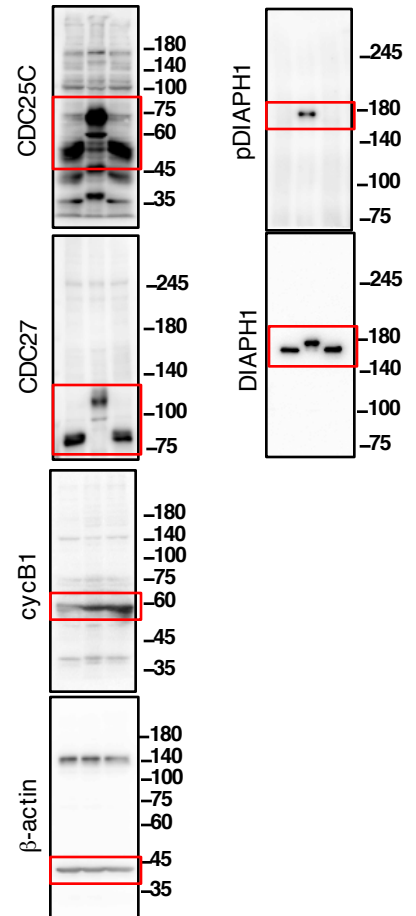

Supplementary Figure 9. raw data for Figure 1a-f

Figure 2a

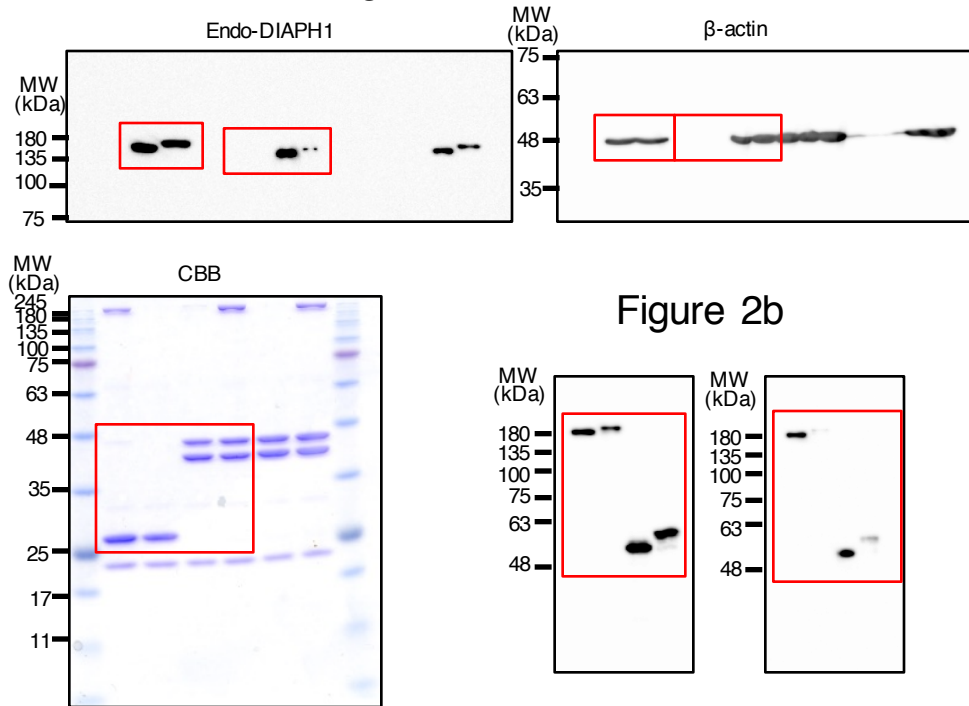

Figure 2b

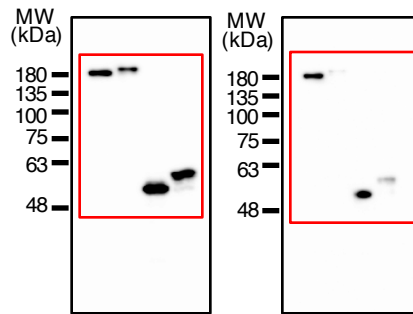

Figure 2c

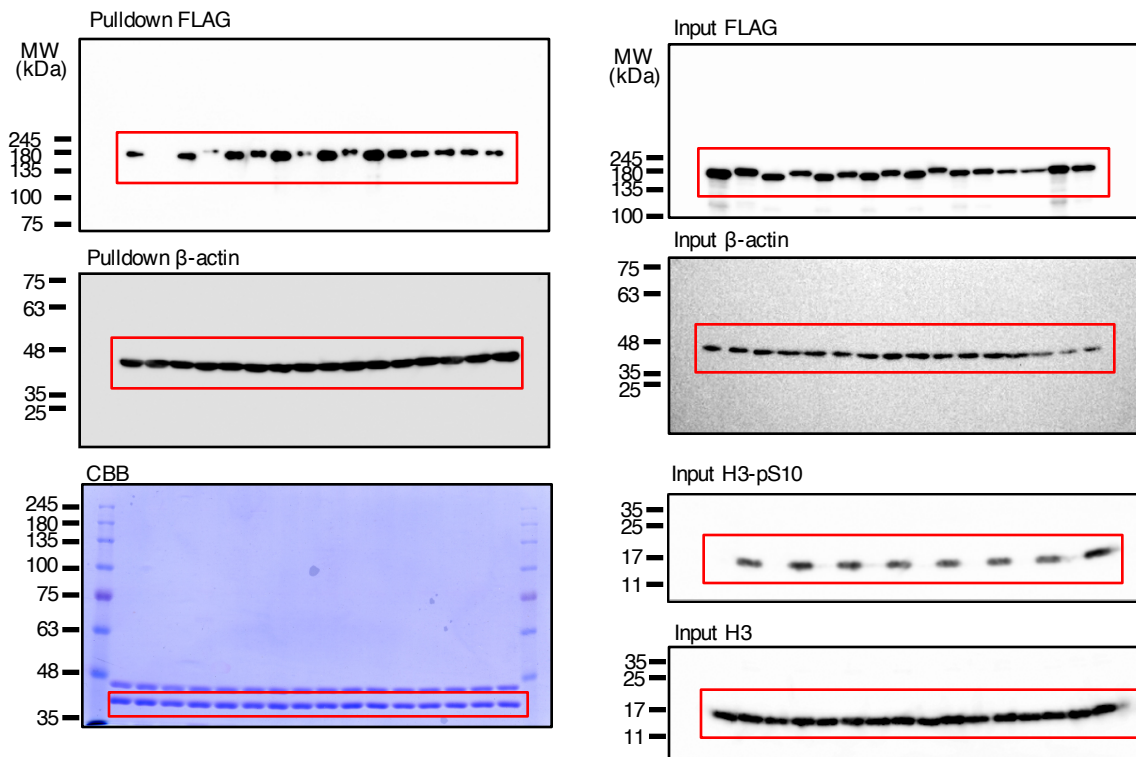

Figure 2d

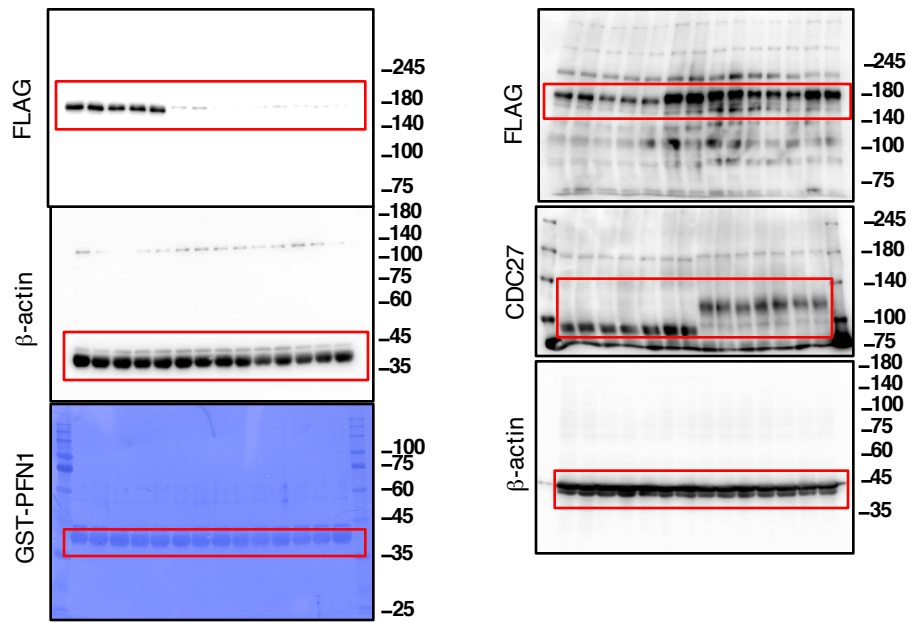



## Supplementary Figure 1a

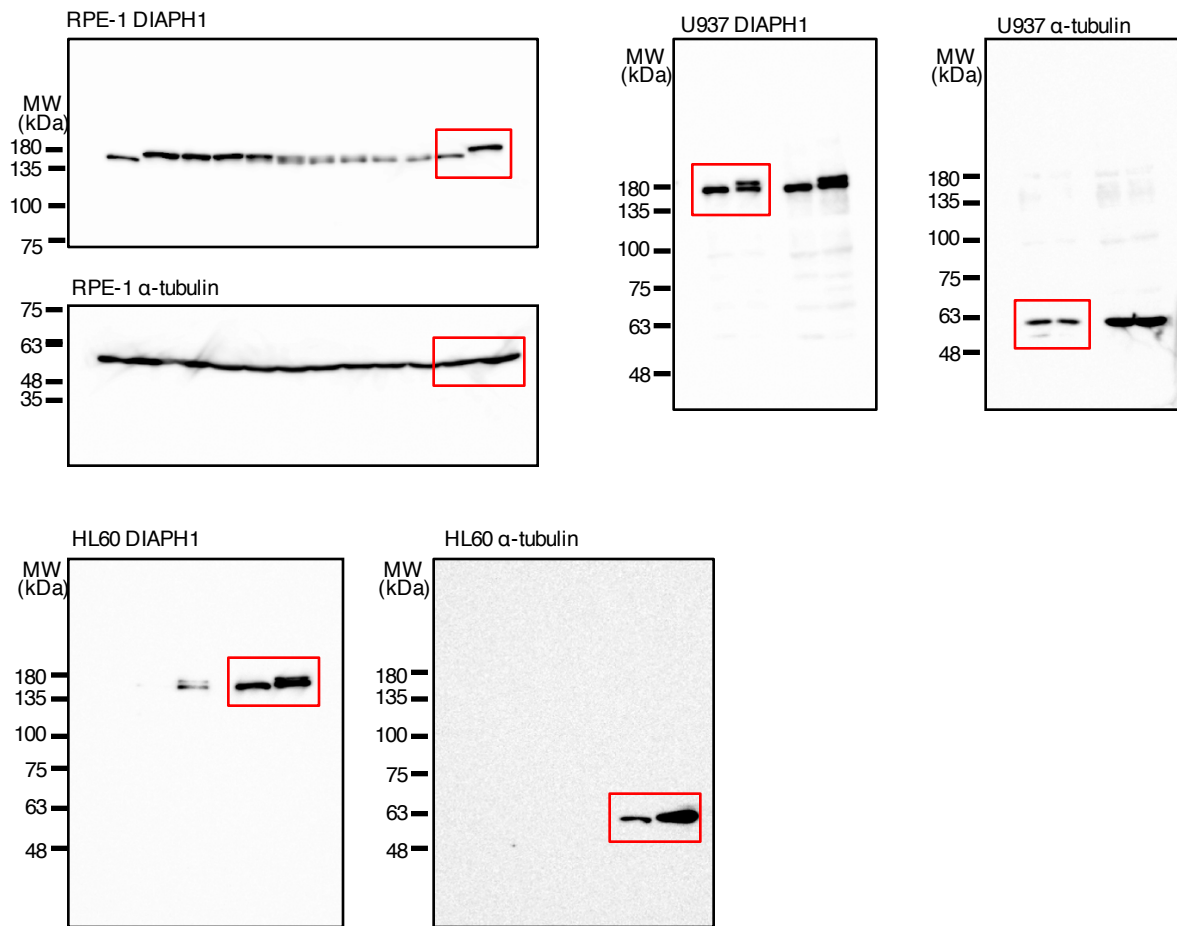

## Supplementary Figure 1b

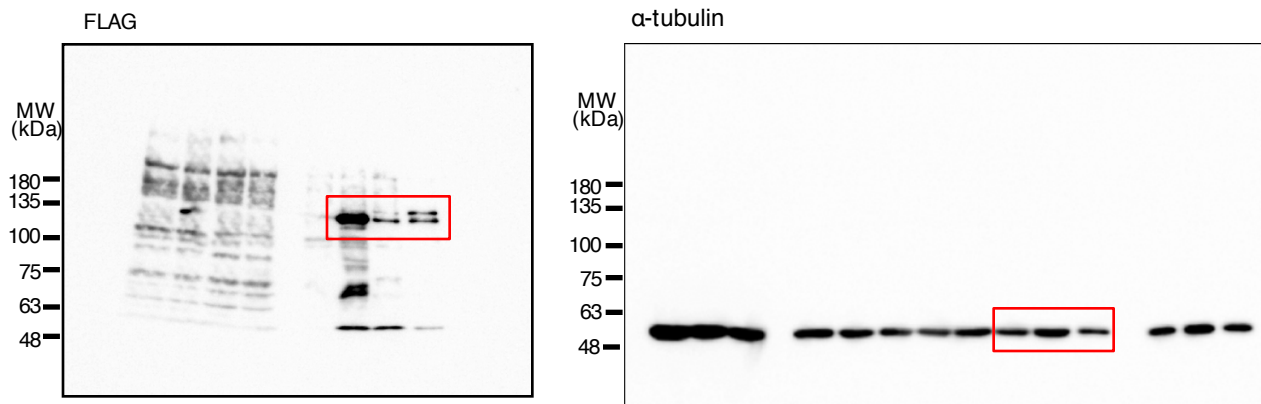

## Supplementary Figure 2b

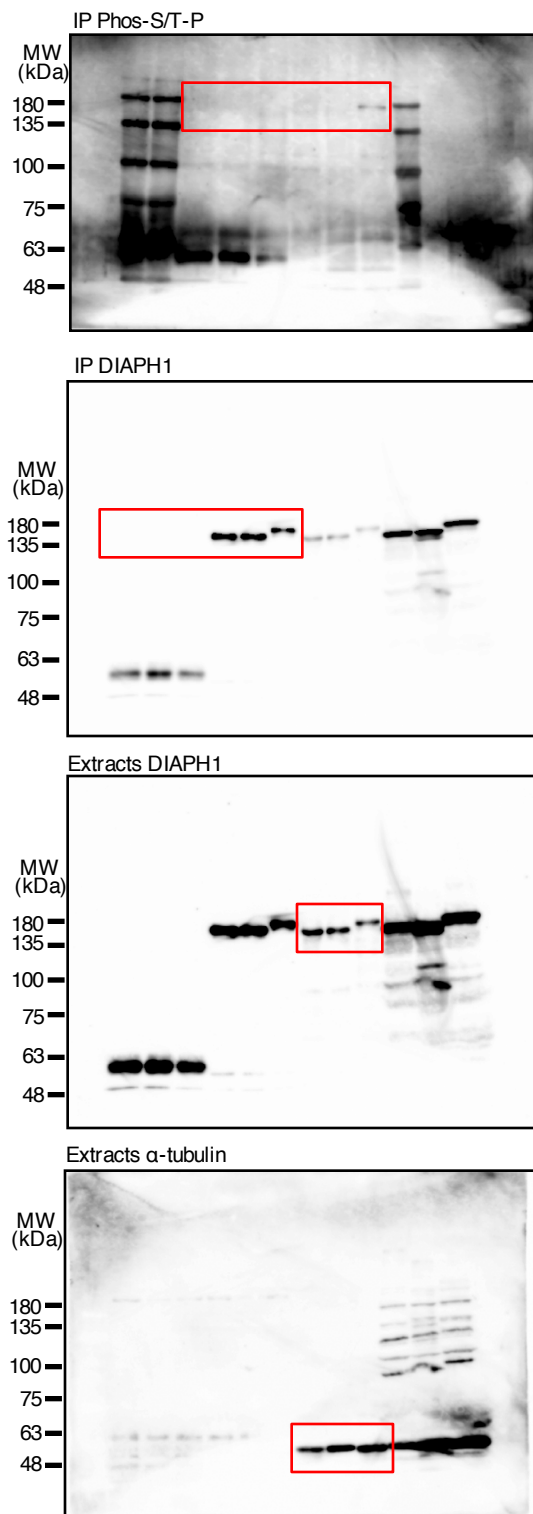

## Supplementary Figure 2c

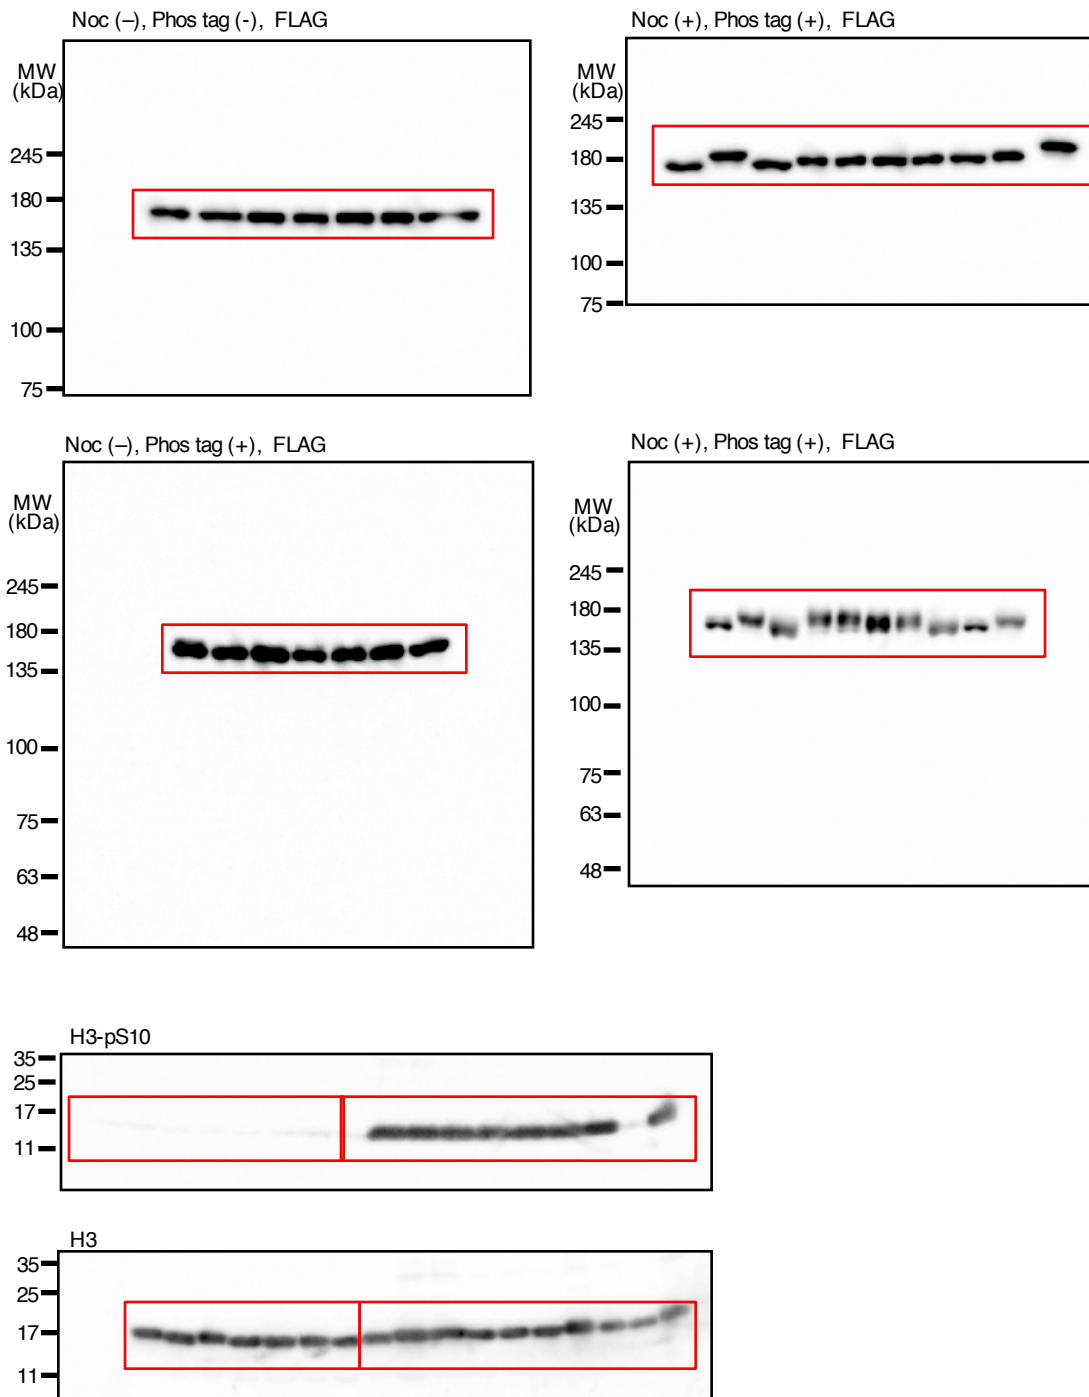

Supplementary Figure 3b

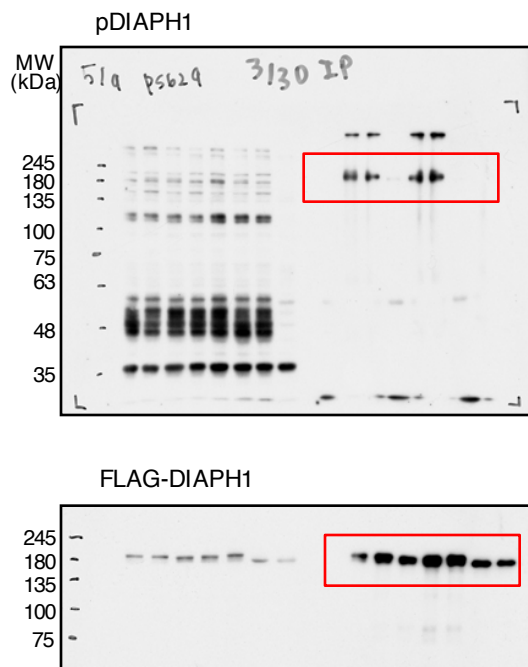

Supplementary Figure 3e

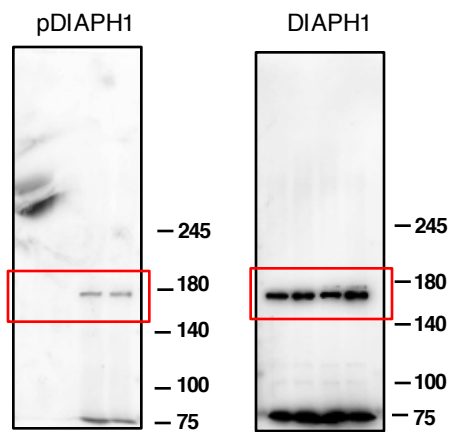

Supplementary  
Figure 4a

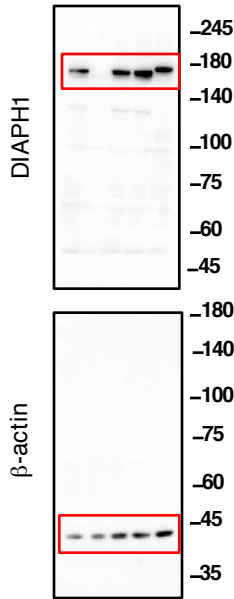

Supplementary  
Figure 4b

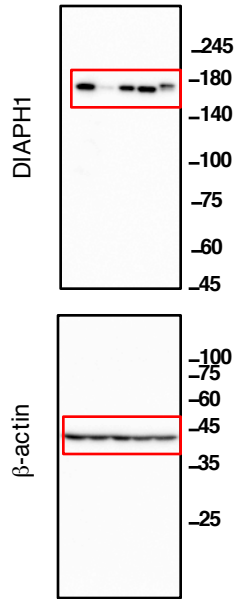

Supplementary  
Figure 4c

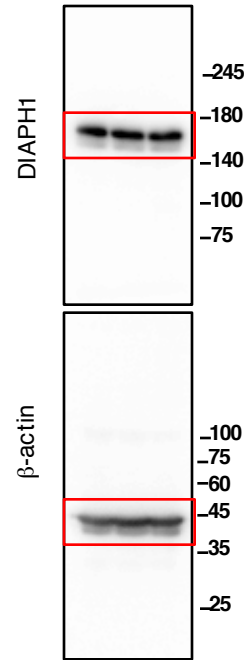

Supplementary  
Figure 4d

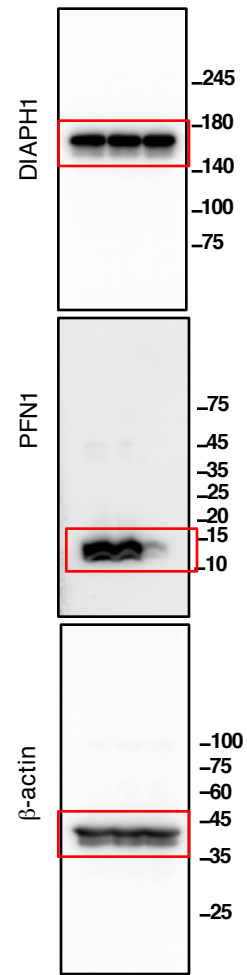

Supplementary  
Figure 4e

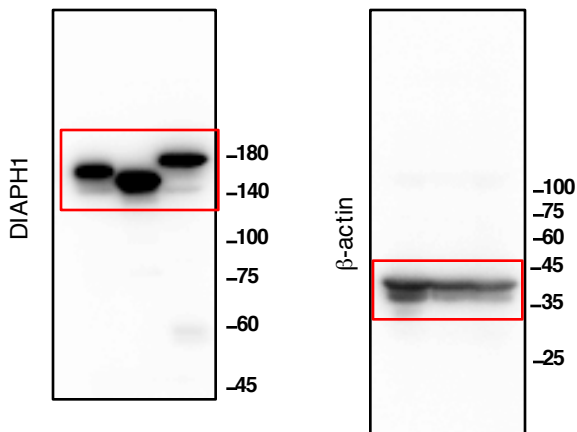

**Supplementary Table I A list of antibodies used in this study**

| <b>Antibodies</b>               | <b>Species</b> | <b>Source</b>                              |
|---------------------------------|----------------|--------------------------------------------|
| Anti-Flag (M2)                  | Mouse          | Sigma, St. Louis, MO                       |
| Anti-RhoA (67B9)                | Rabbit         | Cell Signaling Technology, Boston, MA      |
| Anti-PFN1 (3237)                | Rabbit         | Cell Signaling Technology, Boston, MA      |
| Anti-mDia1 (51)                 | Mouse          | BD Transduction Laboratories, San Jose, CA |
| Anti- $\alpha$ -tubulin (T0926) | Mouse          | Sigma, St. Louis, MO                       |
| Anti- $\beta$ -Actin (AC-15)    | Mouse          | Abcam, Cambridge, United Kingdom           |
| Anti-Phospho-S/T-P (MPM-2)      | Mouse          | Merck (Millipore), Darmstadt, Germany      |
| Anti-Histone H3 (ab1791)        | Rabbit         | Abcam, Cambridge, United Kingdom           |
| Anti-Histone H3-pSer10          | Rabbit         | Merck (Millipore), Darmstadt, Germany      |
| Anti-DIAPH1-pSer629             | Rabbit         | This study                                 |
| Anti-MAD2 (GTX104680)           | Rabbit         | GeneTex, Irvine, CA                        |
| Anti-BUBR1 (612502)             | Mouse          | BD Transduction Laboratories, San Jose, CA |
| Anti-CREST (15-234-0001)        | Human          | Antibodies Inc.                            |
| Anti-CDC25C (sc327)             | Rabbit         | Santa Cruz Biotechnologies, Santa Cruz, CA |
| Anti-CDC27 (AF3.1)              | Mouse          | Santa Cruz Biotechnologies, Santa Cruz, CA |
| Anti-CDK1 (H-297)               | Rabbit         | Santa Cruz Biotechnologies, Santa Cruz, CA |
| Anti-Cyclin B1 (H-433)          | Rabbit         | Santa Cruz Biotechnologies, Santa Cruz, CA |
| Anti-Hec1 (9G3.23)              | Mouse          | Novus Biologicals                          |
| Anti-Mlc2 (ab79935)             | Rabbit         | Abcam, Cambridge, United Kingdom           |
| Anti-Phospho-Mlc2 (S19)(3671)   | Rabbit         | Cell Signaling Technology, Boston, MA      |
| Anti-mouse IgG Alexa 568        | Goat           | Invitrogen                                 |
| Anti-human IgG Alexa 488        | Goat           | Invitrogen                                 |
